# Supplementary material for: FOXO1 transcription factor plays a key role in T cell—HIV-1 interaction
Source: PubMed Central journal article supplement (PMC6513100; doi:10.1371/journal.ppat.1007669), 2019-05-01

# S3 Figure

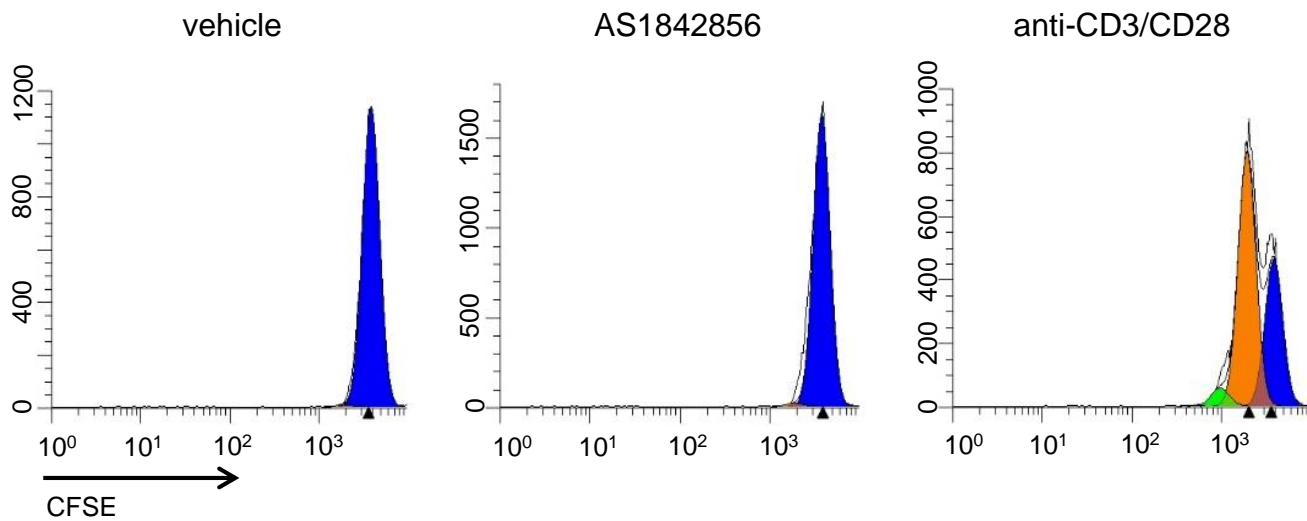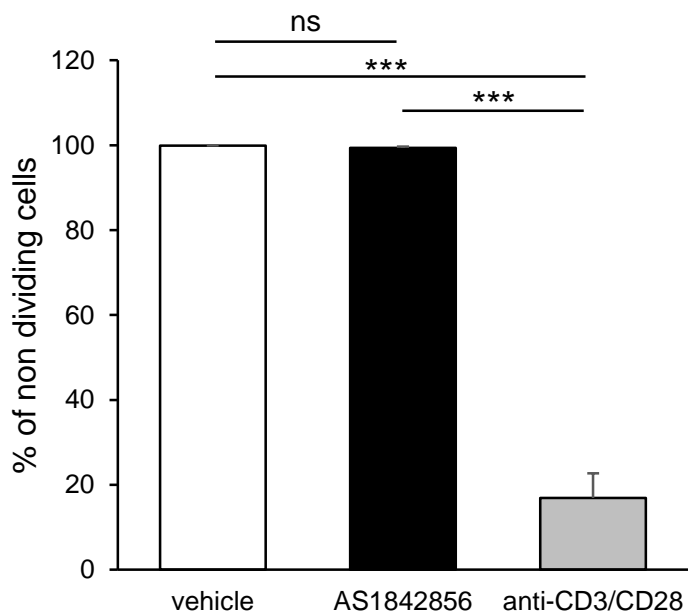

Supplement: ppat.1007669.s004.pdf [file ppat.1007669.s004.pdf]
